# Supplementary material for: Iridium-based double perovskites for efficient water oxidation in acid media
Source: PubMed Central journal article supplement (PMC4979062; doi:10.1038/ncomms12363), 2016-08-08
Supplement: ncomms12363-s2.pdf [file ncomms12363-s2.pdf]

**Editorial Note:** this manuscript has been previously reviewed at another journal that is not operating a transparent peer review scheme. This document only contains reviewer comments and rebuttal letters for versions considered at Nature Communications.
